# Supplementary material
Source: HighWire-hosted journal article supplement (https://erj.ersjournals.com/content/56/3/2000217)
Supplement: inline-supplementary-material-3 [file inline-supplementary-material-3.pdf]

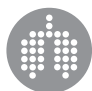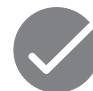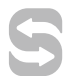

SHAREABLE PDF

# Epigenome-wide association study of DNA methylation and adult asthma in the Agricultural Lung Health Study

Thanh T. Hoang <sup>1,19</sup>, Sinjini Sikdar<sup>1,2,19</sup>, Cheng-Jian Xu<sup>3,4,19</sup>, Mi Kyeong Lee<sup>1</sup>, Jonathan Cardwell<sup>5</sup>, Erick Forno <sup>6,7</sup>, Medea Imboden<sup>8,9</sup>, Ayoung Jeong<sup>8,9</sup>, Anne-Marie Madore<sup>10</sup>, Cancan Qi<sup>11</sup>, Tianyuan Wang<sup>12</sup>, Brian D. Bennett<sup>12</sup>, James M. Ward<sup>12</sup>, Christine G. Parks<sup>1</sup>, Laura E. Beane-Freeman<sup>13</sup>, Debra King<sup>14</sup>, Alison Motsinger-Reif<sup>15</sup>, David M. Umbach<sup>15</sup>, Annah B. Wyss<sup>1</sup>, David A. Schwartz<sup>5</sup>, Juan C. Celedón<sup>6,7</sup>, Catherine Laprise<sup>10,16,17</sup>, Carole Ober <sup>18</sup>, Nicole Probst-Hensch <sup>8,9</sup>, Ivana V. Yang<sup>5</sup>, Gerard H. Koppelman <sup>11</sup> and Stephanie J. London <sup>1</sup>

**Affiliations:** <sup>1</sup>Epidemiology Branch, National Institute of Environmental Health Sciences, National Institutes of Health, Dept of Health and Human Services, Research Triangle Park, NC, USA. <sup>2</sup>Dept of Mathematics and Statistics, Old Dominion University, Norfolk, VA, USA. <sup>3</sup>Centre for Individualised Infection Medicine (CiiM), Hannover Medical School and the Helmholtz Centre for Infection Research, Hannover, Germany. <sup>4</sup>Centre for Experimental and Clinical Infection Research (TWINCORE), Hannover Medical School and the Helmholtz Centre for Infection Research, Hannover, Germany. <sup>5</sup>Dept of Medicine, University of Colorado Anschutz Medical Campus, Aurora, CO, USA. <sup>6</sup>Division of Pulmonary Medicine, UPMC Children's Hospital of Pittsburgh, Pittsburgh, PA, USA. <sup>7</sup>Dept of Pediatrics, University of Pittsburgh School of Medicine, Pittsburgh, PA, USA. <sup>8</sup>Chronic Disease Epidemiology Unit, Dept of Epidemiology and Public Health, Swiss Tropical and Public Health Institute, Basel, Switzerland. <sup>9</sup>Dept of Public Health, University of Basel, Basel, Switzerland. <sup>10</sup>Département des Sciences Fondamentales, Université du Québec à Chicoutimi, Saguenay, QC, Canada. <sup>11</sup>Dept of Pediatric Pulmonology and Pediatric Allergy, University Medical Center Groningen, University of Groningen, Beatrix Children's Hospital and GRIAC Research Institute, Groningen, The Netherlands. <sup>12</sup>Integrative Bioinformatics Support Group, National Institutes of Health, Dept of Health and Human Services, Research Triangle Park, NC, USA. <sup>13</sup>Occupational and Environmental Epidemiology Branch, National Cancer Institute, Bethesda, MD, USA. <sup>14</sup>Clinical Pathology Group, National Institute of Environmental Health Sciences, National Institutes of Health, Dept of Health and Human Services, Research Triangle Park, NC, USA. <sup>15</sup>Biostatistics and Computational Biology Branch, National Institute of Environmental Health Sciences, National Institutes of Health, Dept of Health and Human Services, Research Triangle Park, NC, USA. <sup>16</sup>Centre Intersectoriel en Santé Durable, Département des Sciences Fondamentales, Université du Québec à Chicoutimi, Saguenay, QC, Canada. <sup>17</sup>Dept of Pediatrics, Centre Intégré Universitaire de Santé et de Services Sociaux du Saguenay-Lac-Saint-Jean, Saguenay, QC, Canada. <sup>18</sup>Dept of Human Genetics, University of Chicago, Chicago, IL, USA. <sup>19</sup>Joint first authors.

**Correspondence:** Stephanie J. London, National Institute of Environmental Health Sciences, PO Box 12233, MD A3-05, Research Triangle Park, NC 27709, USA. E-mail: london2@niehs.nih.gov

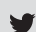

@ERSpublications

**Distinct methylation signals are found in non-atopic and atopic asthma. Most are related to gene expression and are replicated in asthma-relevant tissues, confirming the value of blood DNA methylation for identifying novel genes linked in asthma pathogenesis.** <https://bit.ly/2VnbJg3>

**Cite this article as:** Hoang TT, Sikdar S, Xu C-J, *et al.* Epigenome-wide association study of DNA methylation and adult asthma in the Agricultural Lung Health Study. *Eur Respir J* 2020; 56: 2000217 [<https://doi.org/10.1183/13993003.00217-2020>].

This single-page version can be shared freely online.

**ABSTRACT** Epigenome-wide studies of methylation in children support a role for epigenetic mechanisms in asthma; however, studies in adults are rare and few have examined non-atopic asthma. We conducted the largest epigenome-wide association study (EWAS) of blood DNA methylation in adults in relation to non-atopic and atopic asthma.

We measured DNA methylation in blood using the Illumina MethylationEPIC array among 2286 participants in a case-control study of current adult asthma nested within a United States agricultural cohort. Atopy was defined by serum specific immunoglobulin E (IgE). Participants were categorised as atopy without asthma (n=185), non-atopic asthma (n=673), atopic asthma (n=271), or a reference group of neither atopy nor asthma (n=1157). Analyses were conducted using logistic regression.

No associations were observed with atopy without asthma. Numerous cytosine-phosphate-guanine (CpG) sites were differentially methylated in non-atopic asthma (eight at family-wise error rate (FWER)  $p < 9 \times 10^{-8}$ , 524 at false discovery rate (FDR) less than 0.05) and implicated 382 novel genes. More CpG sites were identified in atopic asthma (181 at FWER, 1086 at FDR) and implicated 569 novel genes. 104 FDR CpG sites overlapped. 35% of CpG sites in non-atopic asthma and 91% in atopic asthma replicated in studies of whole blood, eosinophils, airway epithelium, or nasal epithelium. Implicated genes were enriched in pathways related to the nervous system or inflammation.

We identified numerous, distinct differentially methylated CpG sites in non-atopic and atopic asthma. Many CpG sites from blood replicated in asthma-relevant tissues. These circulating biomarkers reflect risk and sequelae of disease, as well as implicate novel genes associated with non-atopic and atopic asthma.
